# Supplementary material
Source: PubMed Central journal article supplement (PMC7151333)
Supplement: NEJMc2007589_appendix.pdf [file NEJMc2007589_appendix.pdf]

## Supplementary Appendix

This appendix has been provided by the authors to give readers additional information about their work.

Supplement to: Canelli R, Connor CW, Gonzalez M, Nozari A, Ortega R. Barrier enclosure during endotracheal intubation. *N Engl J Med*. DOI: 10.1056/NEJMc2007589

# Table of Contents

1. Diagram of the prototype, as described by Dr. Lai Hsien-Yung

Diagram of the prototype, as described by Dr. Lai Hsien-Yung

(<https://www.taiwannews.com.tw/en/news/3902435>)

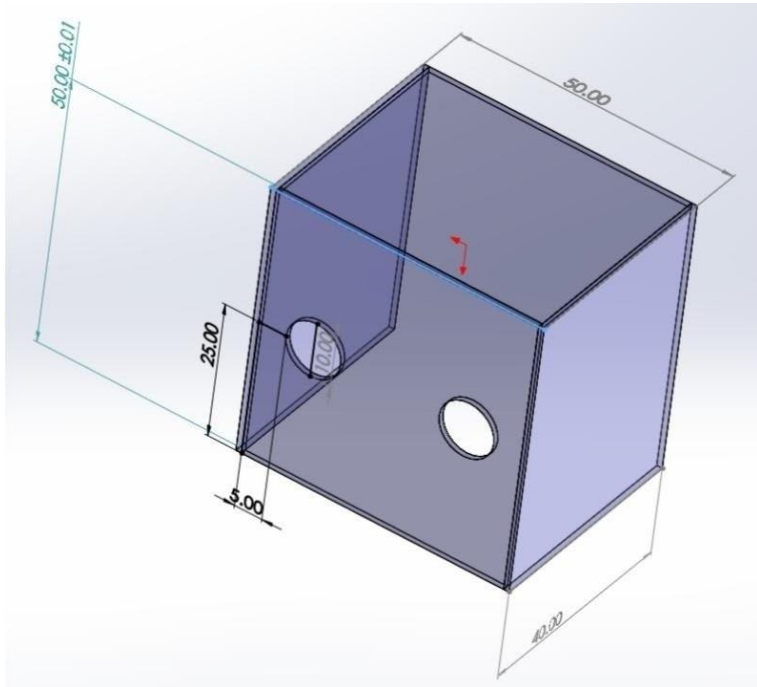

L: 40 cm (16 in)

H: 50 cm (20 in)

W: 50 cm (20 in)

Diameter of the circular opening for insertion of arms: 10 cm (4 in)

Position of the circular opening: 25 cm (10 in) from base and 5 cm (2 in) from the side of the box
